# Supplementary material for: CRK41 Modulates Microtubule Depolymerization in Response to Salt Stress in Arabidopsis
Source: MDPI journal article supplement (doi:10.3390/plants12061285), 2023-03-12
Supplement: s1 [file s1]

**Table S1.** Primers used in this work.

| Primers used for quantitative real-time PCR |               |                             |                             |
|---------------------------------------------|---------------|-----------------------------|-----------------------------|
| AGI                                         | Gene          | Primer_forward (5'-3')      | Primer_reverse (5'-3')      |
| AT3G45640                                   | <i>MPK3</i>   | GATTGTGAT-<br>TTCGGTCTTGC   | TTTAC-<br>CAGGGAACAAAGGCT   |
| AT2G43790                                   | <i>MPK6</i>   | CATTATCCGAAGAACATT-<br>GCC  | TACTT-<br>GGTTTCAAATCCCTGTG |
| AT4G00970                                   | <i>CRK41</i>  | CCAAATCATCCCAATTCTC<br>C    | TAGATTCACTGCGGCTT-<br>GAG   |
| AT3G18780                                   | <i>ACTIN2</i> | TACAGTGTCTG-<br>GATCGGTGGTT | CGGCCTTGGA-<br>GATCCACAT    |

  

| Primers used for PCR fragments |              |                              |                             |
|--------------------------------|--------------|------------------------------|-----------------------------|
| AGI                            | Gene         | Primer_forward (5'-3')       | Primer_reverse (5'-3')      |
| AT3G45640                      | <i>MPK3</i>  | ATGAACAC-<br>CGGCGGTGGCCAAT  | CTAACCGTATGTT-<br>GGATTGAG  |
| AT2G43790                      | <i>MPK6</i>  | ATGGAC-<br>GGTGGTTCAGGTCAACC | CTATTGCTGATATTCTG-<br>GATTG |
| AT4G00970                      | <i>CRK41</i> | ATGACTAGTTCTT-<br>GTTCTTTGTC | ACGAGCATCGAACTCGG-<br>TAATT |

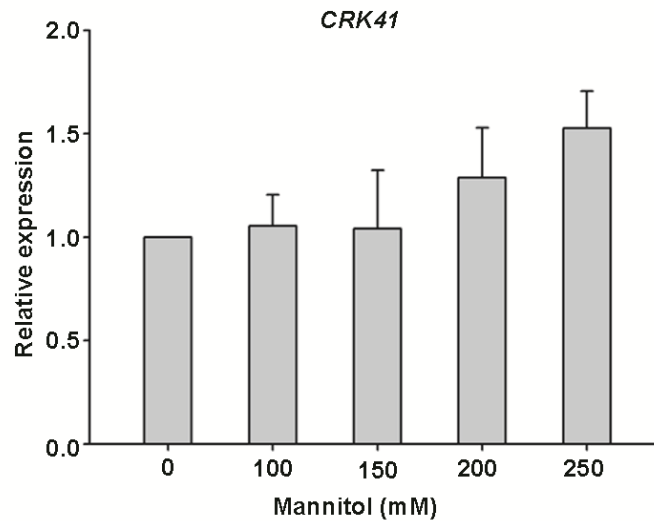

**Figure S1.** The relative expression level of *CRK41* was determined after different concentrations of mannitol treatment. SD is represented by the error bars;  $n = 3$ .

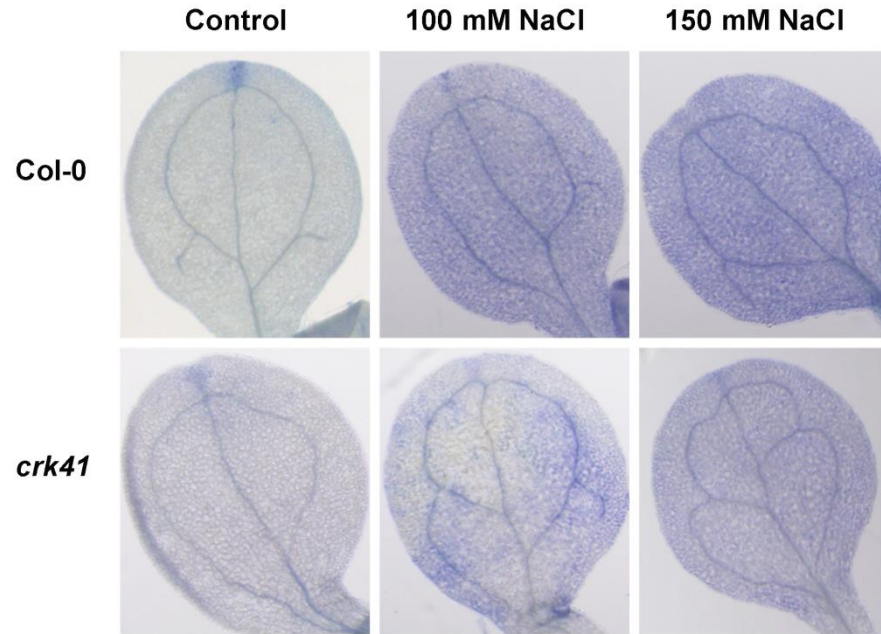

**Figure S2.** Cell death induced by different concentrations of NaCl in leaves of Col-0 and *crk41* mutant. 7-day-old plants were treated with 100 mM and 150 mM NaCl for 18 h and stained with trypan blue. The leaves treated with ddH<sub>2</sub>O were used as control.

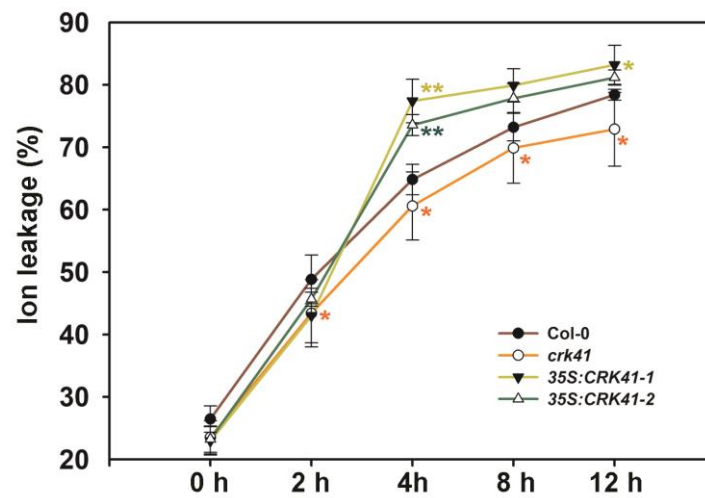

**Figure S3.** Ion leakage in seedlings of Col-0, *crk41* mutant, 35S:CRK41-1 and 35S:CRK41-2 treated with NaCl. SD is represented by the error bars. \*  $p < 0.05$ ; \*\*  $p < 0.01$  vs. wild type in the same condition.

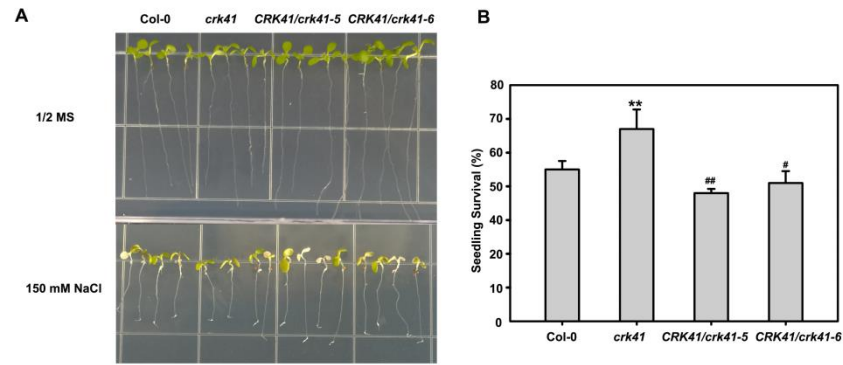

**Figure S4.** The salt-sensitive phenotype could be restored in the *crk41* complemented lines. (A) The growth phenotypes of the seedlings in Col-0, *crk41* mutant, *CRK41/crk41-5* and *CRK41/crk41-6* (6-day-old) after 150 mM NaCl treatments for 3 d. (B) The seedling survival rates of Col-0, *crk41* mutant, *CRK41/crk41-5* and *CRK41/crk41-6* (6-day-old) were measured after 150 mM NaCl treatment for 5 d. SD is represented by the error bars;  $n = 3$  (at least 60 seeds were measured in per genotype of each replicate). \*\*  $p < 0.01$  vs. wild type; #  $p < 0.05$ ; ##  $p < 0.01$  vs. *crk41* mutant.

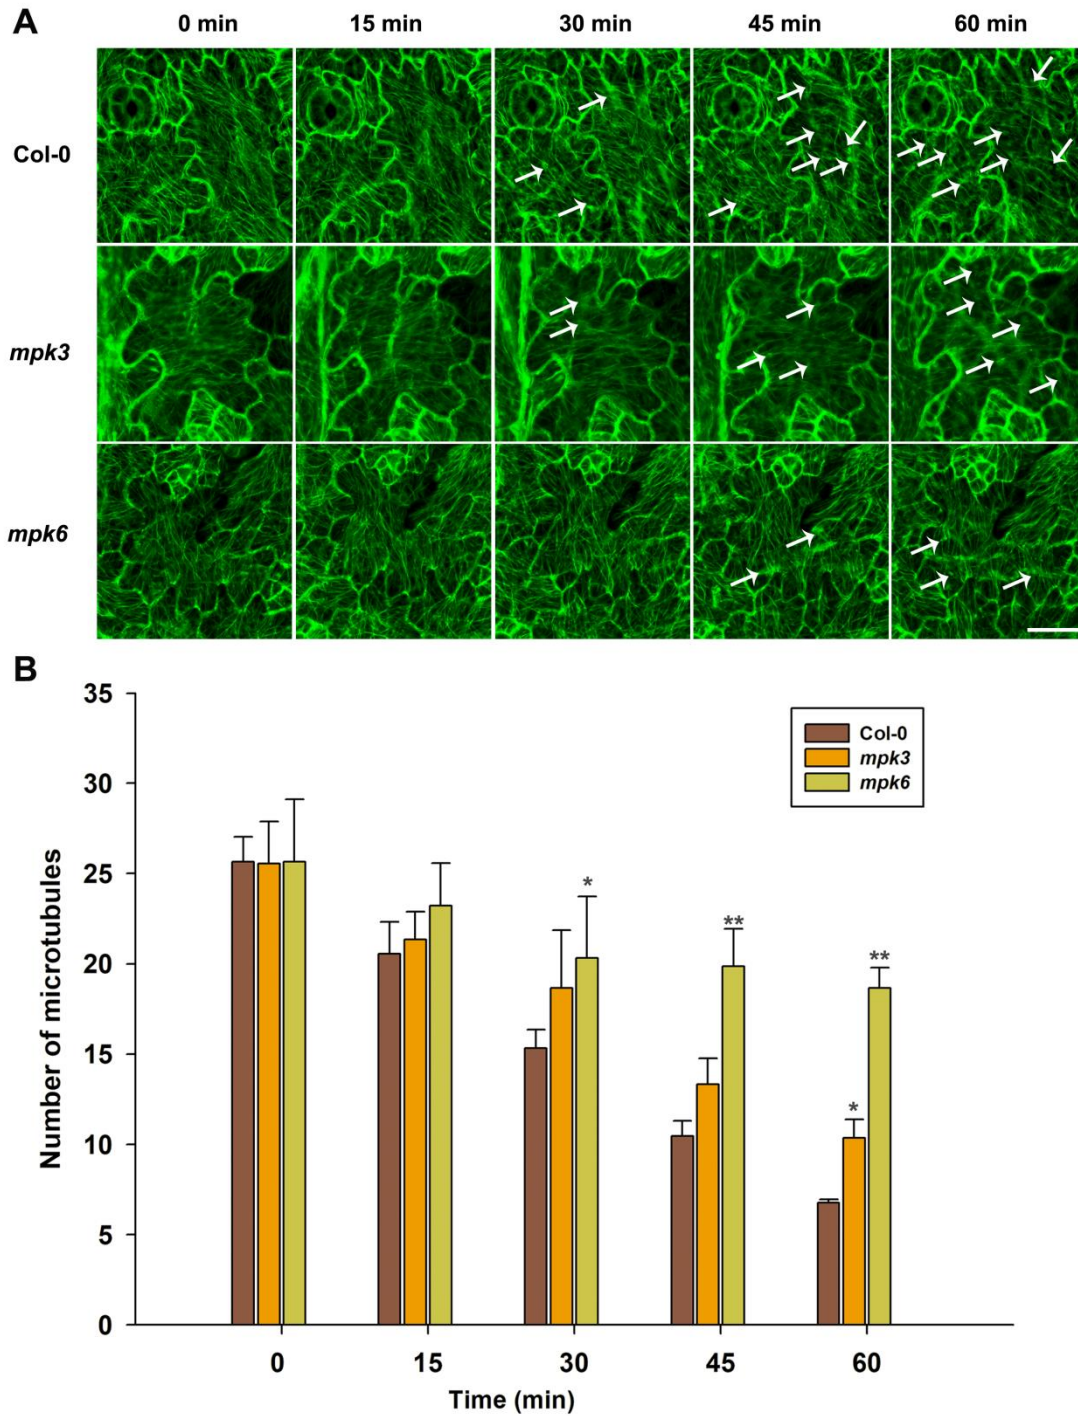

**Figure S5.** *MPK3* and *MKP6* have been identified as regulators of cortical microtubule depolymerization when exposed to salt stress. (A) Analysis of the cortical microtubule modifications caused by 150 mM NaCl in Col-0, *mpk3* and *mpk6* was conducted through a series of sequential images (scale bar = 20  $\mu$ m). The arrows indicated representative microtubule depolymerization. (B) Image tool software was utilized to quantify cortical microtubules in Col-0, *mpk3* and *mpk6*, with a minimum of 18 cells from three samples being analyzed. SD is represented by the error bars. \*  $p < 0.05$ ; \*\*  $p < 0.01$  vs. wild type in the same condition.
